# Supplementary material
Source: MDPI journal article supplement (https://www.mdpi.com/2072-4292/12/5/801)
Supplement: s1 [file s1]

**Table S1.** Remote sensing datasets

| Satellite Sensor/<br>Data Type | Date                                                       | Use of the study                                                                                                                                |
|--------------------------------|------------------------------------------------------------|-------------------------------------------------------------------------------------------------------------------------------------------------|
| ETM+                           | 03/08/2013,05/11/2013,08/15/2013,<br>01/22/2014,06/20/2016 | Predict 8-day "Landsat-like" data as the fine LST input (Also, extract information of Land use/Land cover and LST in 06/28/2013 and 01/22/2014) |
| OLI-TIRS                       | 04/10/2013,06/28/2013,10/10/2013,<br>11/11/2013,12/13/2013 |                                                                                                                                                 |
| MOD11A1                        | Mar 2013 to Feb 2014                                       | Predict 8-day "Landsat-like" data as the coarse LST input                                                                                       |
| MOD11A2                        | Mar 2013 to Feb 2014                                       | Predict 8-day "Landsat-like" data as a reference of spatial features                                                                            |
| MOD13Q1                        | Mar 2013 to Feb 2014                                       | Predict monthly 30m resolution NDVI data as the reference of spatial features                                                                   |

**Table S2.** Accuracy assessment of Land Use/Land Cover (LULC) classification.

| Date       | User Accuracy(%) |            |       |           | Overall Accuracy(%) | Kappa Coefficient |
|------------|------------------|------------|-------|-----------|---------------------|-------------------|
|            | ISA              | Vegetation | Water | Bare Soil |                     |                   |
| 2013/06/28 | 99.55            | 82.36      | 95.78 | 84.67     | 89.25               | 0.86              |
| 2014/01/22 | 96.21            | 90.63      | 96.23 | 86.89     | 90.33               | 0.88              |
| 2016/06/20 | 98.35            | 87.22      | 97.46 | 83.24     | 91.27               | 0.90              |
| 2017/01/21 | 100              | 96.59      | 98.99 | 85.15     | 94.69               | 0.94              |

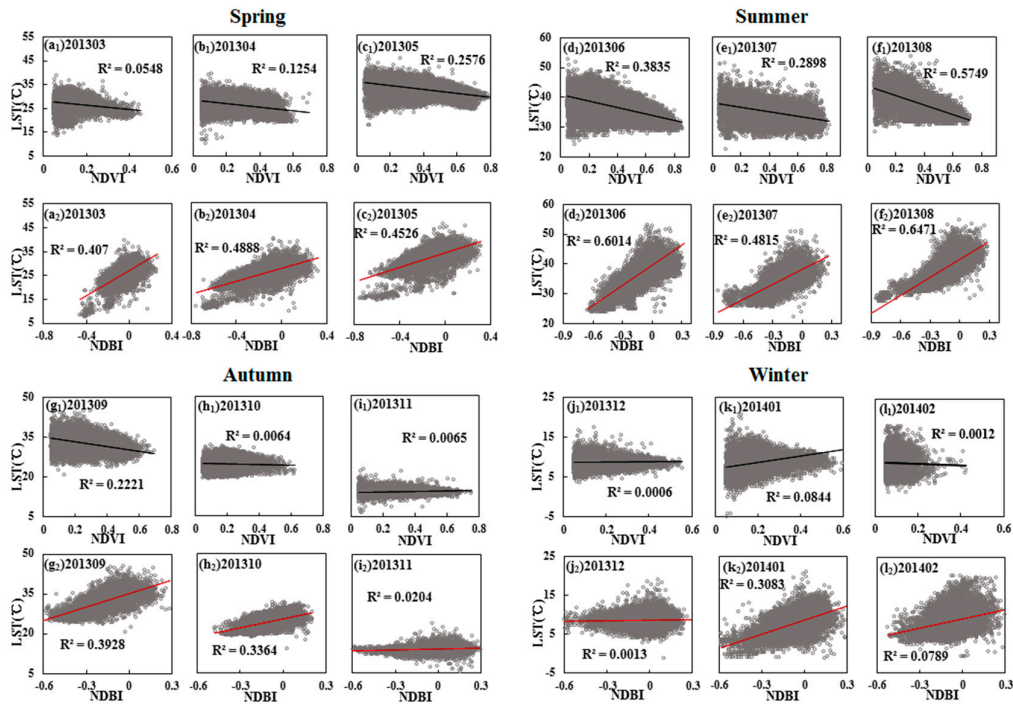

**Figure S1.** The monthly series about the correlations of LST with NDVI and NDBI in 2013.
